# Supplementary material for: Delay in patients suspected of transient ischaemic attack: a cross-sectional study
Source: PubMed Central journal article supplement — BMJ Open. 2019 Feb 27;9(2):e027161. doi: 10.1136/bmjopen-2018-027161 (PMC6398704; doi:10.1136/bmjopen-2018-027161), 2019-02-27
Supplement: bmjopen-2018-027161.draft_revisions.pdf [file bmjopen-2018-027161.draft_revisions.pdf]

# BMJ Open

BMJ Open is committed to open peer review. As part of this commitment we make the peer review history of every article we publish publicly available.

When an article is published we post the peer reviewers' comments and the authors' responses online. We also post the versions of the paper that were used during peer review. These are the versions that the peer review comments apply to.

The versions of the paper that follow are the versions that were submitted during the peer review process. They are not the versions of record or the final published versions. They should not be cited or distributed as the published version of this manuscript.

BMJ Open is an open access journal and the full, final, typeset and author-corrected version of record of the manuscript is available on our site with no access controls, subscription charges or pay-per-view fees (<http://bmjopen.bmj.com>).

If you have any questions on BMJ Open's open peer review process please email [editorial.bmjopen@bmj.com](mailto:editorial.bmjopen@bmj.com)

# BMJ Open

## Considerable patient and physician delay in suspected TIA

|                               |                                                                                                                                                                                                                                                                                                                                                                                                                                                                                                      |
|-------------------------------|------------------------------------------------------------------------------------------------------------------------------------------------------------------------------------------------------------------------------------------------------------------------------------------------------------------------------------------------------------------------------------------------------------------------------------------------------------------------------------------------------|
| Journal:                      | <i>BMJ Open</i>                                                                                                                                                                                                                                                                                                                                                                                                                                                                                      |
| Manuscript ID                 | bmjopen-2018-027161                                                                                                                                                                                                                                                                                                                                                                                                                                                                                  |
| Article Type:                 | Research                                                                                                                                                                                                                                                                                                                                                                                                                                                                                             |
| Date Submitted by the Author: | 09-Oct-2018                                                                                                                                                                                                                                                                                                                                                                                                                                                                                          |
| Complete List of Authors:     | Dolmans, Louis; University Medical Center Utrecht, Julius Center for Health Sciences and Primary Care<br>Kappelle, Jaap; University Medical Center Utrecht, Neurology<br>Bartelink, Marie-Louise; University Medical Center Utrecht, Julius Center for Health Sciences and Primary Care<br>Hoes, Arno; University Medical Center Utrecht, Julius Center for Health Sciences and Primary Care<br>Rutten, Frans; University Medical Center Utrecht, Julius Center for Health Sciences and Primary Care |
| Keywords:                     | Stroke < NEUROLOGY, NEUROLOGY, Organisation of health services < HEALTH SERVICES ADMINISTRATION & MANAGEMENT                                                                                                                                                                                                                                                                                                                                                                                         |
|                               |                                                                                                                                                                                                                                                                                                                                                                                                                                                                                                      |

SCHOLARONE™  
Manuscripts

Peer Review Only

## Considerable patient and physician delay in suspected TIA

L Servaas Dolmans<sup>1</sup>, L Jaap Kappelle<sup>2</sup>, Marie-Louise EL Bartelink<sup>1</sup>, Arno W Hoes<sup>1</sup>, Frans H Rutten<sup>1</sup>

<sup>1</sup>Julius Center for Health Sciences and Primary Care, University Medical Center Utrecht, Utrecht University, Utrecht, The Netherlands

<sup>2</sup>Department of Neurology, University Medical Center Utrecht, Utrecht University, Utrecht, The Netherlands

### L Servaas Dolmans, MD (corresponding author)

Julius Center for Health Sciences and Primary Care, University Medical Center Utrecht, Utrecht University

PO Box 85500, Stratenum 6.131 3508 GA Utrecht, The Netherlands

Phone: ++31 88 7568159

E-mail: [L.S.Dolmans@umcutrecht.nl](mailto:L.S.Dolmans@umcutrecht.nl)

Internet: [www.juliuscenter.nl](http://www.juliuscenter.nl)

**Word count:** 1571

## Abstract

### Objectives

Suspected Transient Ischaemic Attack (TIA) necessitates an urgent neurological consultation and a rapid start of antiplatelet therapy to reduce the risk of early ischaemic stroke following a TIA. Guidelines for general practitioners (GPs) emphasise the urgency to install preventive treatment as soon as possible. We aimed to give a contemporary overview of both patient and physician delay.

### Methods

A survey at two rapid-access TIA outpatient clinics in Utrecht, The Netherlands. All patients suspected of TIA were interviewed to assess time delay to diagnosis and treatment, including the time from symptom onset to i) the first contact with a medical service (patient delay), ii) consultation of the GP and iii) assessment at the TIA outpatient clinic. We used the diagnosis of the consulting neurologist as reference.

### Results

Of 93 included patients, 43 (46.2%) received a definite, 13 (14.0%) a probable, 11 (11.8%) a possible and 26 (28.0%) no diagnosis of TIA. Median patient delay was 17.5 (IQR 0.8-66.4) hours, with a delay of more than 24 hours in 36 (38.7%) patients. The GP was first contacted in 76 (81.7%) patients, and median time from first contact to the GP consultation was 2.8 (0.5-18.5) hours. Median time from GP consultation to TIA service visit was 40.8 (IQR 23.1-140.7) hours. Of 62 patients naïve to antithrombotic medication, 27 (43.5%) received antiplatelet therapy from the GP.

### Conclusions

There is substantial patient and physician delay in the process of getting a confirmed TIA diagnosis. As a result in too many patients proper preventive treatment is initiated too late.

**Key words:** TIA, minor stroke, patient delay, physician delay

### Strengths and limitations of this study

- We interviewed patients suspected of TIA before the definite diagnosis was established, thus without bias caused by knowledge of the final diagnosis.
- We were able to provide precise estimates of the different components of the total pre-hospital delay time.
- We also assessed whether antiplatelet therapy was initiated prior to the neurologist's assessment.
- In 11 of 93 cases we used an expert panel to determine the diagnosis of TIA, in absence of a conclusion of the consulting neurologist.
- Our cohort is relatively small, but large enough to provide these estimates of current time delay in patients suspected of TIA.

## Introduction

A Transient Ischaemic Attack (TIA) is a medical emergency, as the risk of a subsequent ischaemic stroke following a TIA is highest in the early stage. Urgent neurological consultation followed by proper stroke preventive treatment reduces this risk substantially, with the rapid start of an antiplatelet agent as key intervention.[1, 2]

Previous studies indicated that around 30 to 40% of patients with TIA delay contacting a medical service for more than 24 hours.[1, 3, 4] Over the past decade, patient awareness campaigns like FAST aimed for better recognition of and a quick response to symptoms suspected of stroke to enable thrombolysis or invasive treatment within the first hours.[5] Although TIA is part of the acute ischaemic brain spectrum, it is unknown whether campaigns like this also positively affect acting upon symptoms that are transient, typically short-lasting and often less distinct.

The EXPRESS study (2007) laid the foundation for a drastic decrease of physician delay to diagnosis and treatment of TIA, i) by the development of rapid-access TIA services, and ii) guidelines for general practitioners (GPs).[1] The Dutch GP guidelines recommend GPs to refer all patients suspected of TIA to a TIA service within 24 hours, and to immediately initiate a platelet aggregation inhibitor, unless it is certain that the patient will be examined by a neurologist on the same day.[6] The UK guidelines recommend the use of the prognostic ABCD2 score (Age, Blood pressure, Clinical features, Duration, Diabetes) to define high-risk patients that have to be examined by the neurologist within 24 hours, but emphasise an immediate start of medication by the GP in any suspected TIA patient.[7]

We aimed to assess current patient and physician delay from onset of suspected TIA symptoms to specialist consultation.

## Methods

We conducted a survey among patients suspected of TIA who were referred to one of two participating rapid-access TIA services in the city of Utrecht, The Netherlands. Consecutive patients were asked to participate when arriving at the TIA service. Patients were excluded in the case of: (1) ongoing symptoms; (2) onset of symptoms in-hospital or outside the Netherlands; (3) severe cognitive impairment; (4) inability to clarify the time of onset of symptoms.

We collected information about the following items: (1) the interval from onset of symptoms to the patient's first contact with a medical service, the interval to the GP visit, and the interval to the TIA service visit; (2) the initiation of an antiplatelet agent; (3) the type and duration of symptoms; (4) the initial reaction of the patient (what did the patient do?); (5) the initial perception (what did the patient think?); (6) general knowledge of TIA. In case a patient had experienced multiple recent (suspected) TIAs, we evaluated the last event.

We considered the consulting neurologist's diagnosis of TIA as reference. Diagnoses were categorised as definite TIA or minor stroke, probable TIA, possible TIA, or no TIA. In 11 cases (11.8%) the neurologist's conclusion was unclear or absent, and three clinicians (LSD,LJK, FHR) decided in a consensus meeting on the diagnosis.

Delay is presented as median with 25-75% interquartile range (IQR). In an overview of results per interview item, we additionally compared results between those with a definite or probable TIA (or minor stroke), and those with no or a possible TIA, applying Chi square tests.

### *Patient and public involvement*

There were no patients or public involved in the design or conduct of this study.

## Results

A total of 103 patients consented to participate. Ten patients were excluded because of: i) ongoing symptoms (n=3), ii) onset of symptoms in-hospital or abroad (n=2), iii) an unclear onset of symptoms (n=3), and iv) severe cognitive impairment (n=2). Table 1 shows characteristics of the 93 participants. Mean (SD) age was 65.2 (13.4) years and 55 (59.1%) were male. The median time from symptom onset to our interview at the TIA service was 4.8 (IQR 1.8 – 13.2) days.

**Table 1. Patient characteristics of 93 patients suspected of TIA**

| Characteristics                                                | Total<br>(N = 93) |
|----------------------------------------------------------------|-------------------|
| Mean age in years (SD)                                         | 65.2 (13.4)       |
| Male, n (%)                                                    | 55 (59.1)         |
| Prior TIA/ischaemic stroke, n (%)                              | 23 (24.7)         |
| Living situation, n (%)                                        |                   |
| Alone                                                          | 25 (26.9)         |
| With a partner                                                 | 66 (71.0)         |
| In a nursing home                                              | 2 (2.1)           |
| Weekend onset of symptoms, n (%)                               | 31 (33.3)         |
| Symptoms, n (%) *                                              |                   |
| Motor                                                          | 32 (34.4)         |
| Sensory                                                        | 21 (22.6)         |
| Visual                                                         | 27 (29.0)         |
| Speech                                                         | 30 (32.3)         |
| Median duration of neurological deficits in hours (25-75% IQR) | 0.5 (0.1 – 2.4)   |
| Diagnosis, n (%) **                                            |                   |
| TIA or minor stroke                                            | 43 (46.2)         |
| Probably TIA                                                   | 13 (14.0)         |
| Possibly TIA                                                   | 11 (11.8)         |
| No TIA (TIA mimic)                                             | 26 (28.0)         |

\* Patients may have experienced more than one symptom

\*\* In 11 patients the definite diagnosis was made by a panel consisting of three of the authors.

TIA, Transient Ischaemic Attack; IQR, interquartile range.

### *Patient delay*

The median delay from symptoms to the first contact with a medical service was 17.5 (IQR 0.8-66.4) hours and did not differ significantly between patients with definite or probable TIA/minor stroke (19.0



1  
2  
3 (IQR 0.9-63.2) hours) and those with possible or no TIA (16.6 (IQR 0.7-92.4) hours). Thirty-six (38.7%)  
4 patients delayed seeking medical help for more than 24 hours. In 76 (81.7%) patients, the GP was the  
5 first contacted healthcare provider; in 7/76 (9.2%) during out of office hours. The emergency  
6 department or ambulance service was contacted directly by seven patients (7.5%) and ten patients  
7 (10.8%) first reported their symptoms to a medical specialist (via an outpatient clinic). In total, four  
8 (4.3%) patients had experienced similar symptoms in the previous three months, however, without  
9 contacting a health care provider.  
10  
11

### 12 *Delays until consultation at the TIA service*

13  
14  
15 Among the 76 patients who contacted the GP, the median time from onset of symptoms to the actual  
16 GP consultation was 25.5 (IQR 4.0-128.0) hours. The (median) GP delay, i.e. the time from the first  
17 contact by the patient to the GP consultation, was 2.8 (0.5-18.5) hours. The subsequent median time  
18 from GP consultation to the consultation at the TIA service was 40.8 (IQR 23.1-140.7) hours. For the  
19 complete cohort, the median time from onset of symptoms to the visit to the TIA service was 114.5 (IQR  
20 44.0-316.6) hours. Figure 1 shows the proportions of patients that contacted a medical service, visited  
21 the GP, and visited the TIA service, at subsequent points in time from symptom onset.  
22  
23  
24

25 **Figure 1. Proportions of patients that contacted a medical service, visited the GP, and the TIA**  
26 **outpatient clinic, at subsequent points in time from symptom onset.**  
27  
28  
29  
30  
31  
32  
33  
34  
35  
36  
37  
38  
39  
40  
41  
42  
43  
44  
45  
46  
47  
48  
49  
50  
51  
52  
53  
54  
55  
56  
57  
58  
59  
60

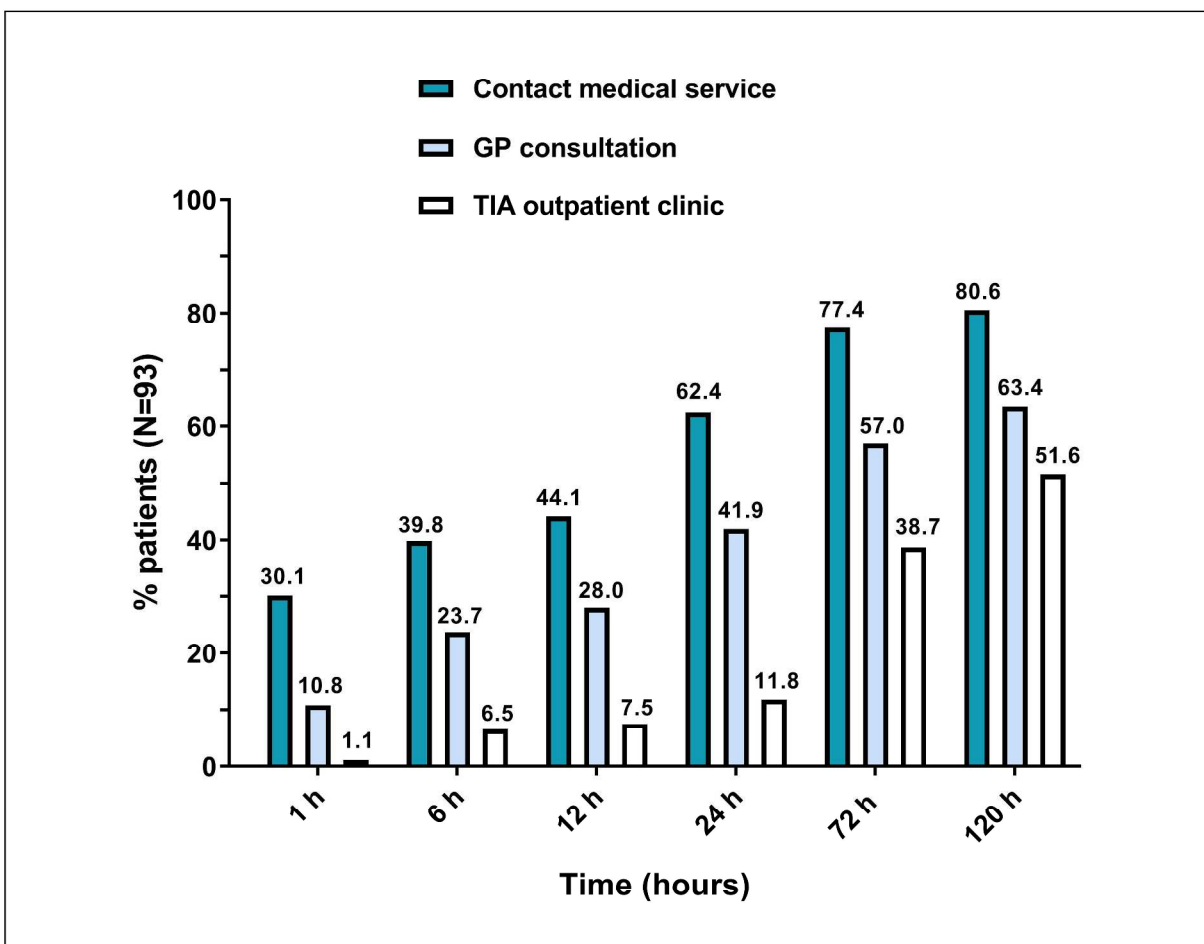

GP, general practitioner; TIA, Transient Ischaemic Attack.

Of the 62 patients who were naïve to antithrombotic medication, 27 (43.5%) received a platelet aggregation inhibitor from the GP prior to the TIA service visit. Comparing these 27 patients with the 35 patients that did not receive a platelet inhibitor, both the delay from GP to the neurologist's assessment (32.7 (22.1-94.6) vs 30.0 (22.3-141.0) hours) and the distribution of definite diagnoses (8/27 (29.6%) vs 10/35 (28.6%) diagnosed as no TIA) were similar.

#### *Initial patient's response and perception of symptoms*

Data on the initial response, perception of symptoms, and the (general) knowledge of TIA are summarised in Table 2. Fifty-four (58.1%) patients initially decided to 'wait and see'. Sixty-five patients (69.9%) did not call for medical help within the first hour after symptom onset. The main reasons for not calling were disappearance of symptoms (27/65, 42.4%), and not considering the symptoms to be threatening (15/65, 23.4%).

Thirty (32.3%) patients interpreted their symptoms as a medical emergency. Asking about initial thoughts on the possible cause of their symptoms, 65 (60.2%) did not consider a TIA. Most patients were familiar with the medical term TIA (76/93, 87.1%), but 40 (43.0%) patients had no or an incorrect idea about the symptoms related to TIA.

**Table 2. Initial response, perception of symptoms, and general knowledge of TIA, in 93 patients suspected of TIA, divided in those with a certain or probably TIA/minor stroke, and in those with no or possibly TIA according to the neurologist\*.**

| Interview item                                                         | Total<br>(N = 93) | Certain or probable<br>TIA/minor stroke<br>(N = 48) | No or possibly<br>TIA/minor stroke<br>(N = 34) |
|------------------------------------------------------------------------|-------------------|-----------------------------------------------------|------------------------------------------------|
|                                                                        | n (%)             | n (%)**                                             | n (%)**                                        |
| <b>Initial response to symptoms</b>                                    |                   |                                                     |                                                |
| <b>Initial response</b>                                                |                   |                                                     |                                                |
| Wait and see                                                           | 54 (58.1)         | 27 (56.3)                                           | 20 (58.8)                                      |
| Direct call to health care provider                                    | 18 (19.4)         | 8 (16.7)                                            | 6 (17.7)                                       |
| Asking a relative for advice                                           | 17 (18.3)         | 10 (20.8)                                           | 7 (20.6)                                       |
| Other                                                                  | 4 (4.4)           | 3 (6.2)                                             | 1 (2.9)                                        |
| <b>Reasons for not seeking medical attention within 1 hour (N=65)</b>  |                   |                                                     |                                                |
| Symptoms had disappeared                                               | 27 (41.5)         | 15 (45.5)                                           | 10 (41.7)                                      |
| Symptoms not considered as threatening                                 | 15 (23.1)         | 8 (24.2)                                            | 6 (25.0)                                       |
| Convinced that symptoms would resolve spontaneously                    | 9 (13.8)          | 4 (12.1)                                            | 3 (12.5)                                       |
| Because it occurred during out of office hours                         | 4 (6.2)           | 2 (6.1)                                             | 1 (4.2)                                        |
| Other                                                                  | 10 (15.4)         | 4 (12.1)                                            | 4 (16.6)                                       |
| <b>Perception of symptoms</b>                                          |                   |                                                     |                                                |
| Interpreted as an emergency                                            | 30 (32.3)         | 17 (35.4)                                           | 8 (23.5)                                       |
| Considered a TIA as possible cause                                     | 37 (39.8)         | 16 (33.3)                                           | 14 (41.2)                                      |
| <b>Experienced severity of symptoms on a scale from 0 to 10 (N=90)</b> |                   |                                                     |                                                |
| 1 to 4                                                                 | 32 (35.6)         | 15 (32.6)                                           | 16 (48.5)                                      |
| 5 to 7                                                                 | 35 (38.9)         | 20 (43.5)                                           | 9 (27.3)                                       |
| 8 to 10                                                                | 23 (25.5)         | 11 (23.9)                                           | 8 (24.2)                                       |
| <b>Knowledge of TIA</b>                                                |                   |                                                     |                                                |
| Ever heard of a TIA                                                    | 76 (87.1)         | 35 (72.9)                                           | 30 (88.2)                                      |
| Correctly knowing key TIA symptoms                                     | 63 (57.0)         | 24 (50.0)                                           | 20 (58.8)                                      |
| Considers rapid treatment (within 24 hrs) necessary                    | 54 (58.1)         | 25 (52.1)                                           | 22 (64.7)                                      |
| Knows that TIA may be a precursor of stroke                            | 44 (47.3)         | 22 (45.8)                                           | 17 (50.0)                                      |

1  
2  
3  
4 \* In 11 patients a definite neurologist's diagnosis could not be retrieved from the medical files.  
5 \*\*No significant differences between the 'certain or probable TIA/minor stroke' patients and 'no or  
6 possible TIA' patients were found, applying Chi square tests.  
7

8  
9 TIA, Transient Ischaemic Attack.  
10  
11  
12  
13  
14  
15  
16  
17  
18  
19  
20  
21  
22  
23  
24  
25  
26  
27  
28  
29  
30  
31  
32  
33  
34  
35  
36  
37  
38

### 39 **Discussion**

40  
41 The majority of patients with symptoms suspected of a TIA in this outpatient population delayed seeking  
42 medical help, resulting in a delay of more than 24 hours in 38.7% of patients. Although the GP was  
43 consulted after a median of only 2.8 (0.5-18.5) hours from the first contact by the patient, it took  
44 another 40.8 (IQR 23.1-140.7) hours before the patient was seen at the TIA clinic. Only a minority  
45 (43.5%) of patients naïve to antithrombotic medication received an antiplatelet agent from the GP prior  
46 to the assessment by the neurologist.  
47  
48

49  
50 The extent of patient delay in our study corresponds with the delay reported in previous studies from  
51 the UK, published between 2006 and 2016.[1, 3, 4, 8, 9] This means that during the last decade no clear  
52 reduction in patient delay was achieved, despite large campaigns explaining the most important stroke  
53 symptoms and stressing its urgency. As in the UK studies, we found that a majority of patients or their  
54 relatives do not respond (directly) to transient symptoms that could be caused by brain ischaemia. The  
55  
56  
57  
58  
59  
60

1  
2  
3 disappearance of symptoms was the main reason for delay, followed by considering the symptoms as  
4 not threatening. Even though most participants were familiar with the medical term TIA, a minority  
5 actually considered the diagnosis.  
6

7  
8 Beyond limiting the delay to a complete diagnostic assessment to identify etiological factors like atrial  
9 fibrillation or significant carotid stenosis, a crucial step forward is initiating secondary prevention with  
10 antiplatelets in the pre-hospital setting. Recent guidelines clearly recommended immediate initiation of  
11 antiplatelets in patients suspected of TIA, but our study shows there is still insufficient awareness among  
12 GPs of this requirement: only in 44% of patients with a suspected TIA antiplatelets were initiated. Unlike  
13 the UK guidelines that recommend GPs to start such treatment in any suspected TIA patient, the Dutch  
14 guidelines recommend GPs to start only if assessment by the neurologist is not feasible the same day.  
15 We consider a clear-cut recommendation to start an antiplatelet in any suspected TIA patient (naïve to  
16 antithrombotics) as the best option.  
17  
18

19  
20 One of the strengths of our study is that we were able to provide precise estimates of the different  
21 components of pre-hospital delay. Moreover, we interviewed not only those with definite TIA, but the  
22 larger domain of suspected TIA cases, importantly, before the definite diagnosis was established.  
23 Therefore, without bias caused by knowledge of the diagnosis. A limitation was that in 11.8% of cases  
24 presence or absence of TIA was determined in consensus by a panel based only on history taking, that is  
25 without the conclusion of the consulting neurologist.  
26  
27

## 28 29 **Conclusion**

30  
31 Current patient and physician delay in suspected TIA is considerable. Our results emphasise the need for  
32 both patient and physician education, aimed at quick consultation at a TIA outpatient clinic and an early  
33 start of secondary prevention by GPs in any case of a suspected TIA.  
34  
35  
36  
37  
38  
39

## 40 **Contributors**

41  
42 LD is PhD candidate and the primary researcher. LD and FH drafted the manuscript. All authors have  
43 been involved in revising it critically, and approved the final manuscript.  
44

## 45 **Funding**

46  
47  
48 None.  
49

## 50 **Competing interests**

51  
52 None declared.  
53

## 54 **Patient consent**

1  
2  
3 No written informed consent procedure required. Data were collected with immediate de-identification  
4 at the patient interview.  
5

### 6 **Ethics Approval**

7  
8 This study was approved by the Medical Research Ethics Committee of the University Medical Center of  
9 Utrecht, the Netherlands. Formal ethical approval was not required.  
10

### 11 **Data sharing statement**

12  
13 No additional data available.  
14  
15  
16  
17  
18  
19  
20  
21  
22  
23  
24  
25  
26  
27  
28  
29  
30  
31  
32  
33  
34  
35  
36  
37  
38  
39

### 40 **References**

41  
42 1 Rothwell PM, Giles MF, Chandratheva A, et al. Effect of urgent treatment of transient ischaemic attack  
43 and minor stroke on early recurrent stroke (EXPRESS study): a prospective population-based sequential  
44 comparison. *Lancet* 2007;370(9596):1432-42.  
45

46  
47 2 Rothwell PM, Algra A, Chen Z, et al. Effect of aspirin on risk and severity of early recurrent stroke after  
48 transient ischaemic attack and ischaemic stroke: time-course analysis of randomised trials. *Lancet*  
49 2016;388(10042):365-375.  
50

51  
52 3 Chandratheva A, Lasserson DS, Geraghty OC, et al. Population-based study of behavior immediately  
53 after transient ischemic attack and minor stroke in 1000 consecutive patients: lessons for public  
54 education. *Stroke* 2010;41(6):1108-14.  
55  
56  
57  
58  
59  
60

1  
2  
3 4 Wilson AD, Coleby D, Taub NA, et al. Delay between symptom onset and clinic attendance following  
4 TIA and minor stroke: the BEATS study. *Age Ageing* 2014;43(2):253-6.  
5

6  
7 5 Flynn D, Ford GA, Rodgers H, et al. A time series evaluation of the FAST National Stroke Awareness  
8 Campaign in England. *PLoS One* 2014;9(8):e104289.  
9

10  
11 6 Verburg AF, Tjon-A-Tsien MR, Verstappen WH, et al. [Summary of the 'Stroke' guideline of the Dutch  
12 College of General Practitioners' (NHG)]. *Ned Tijdschr Geneeskd* 2014;158(1):A7022.

13  
14 7 National Collaborating Centre for Chronic Conditions. Stroke: national clinical guideline for diagnosis  
15 and initial management of acute stroke and transient ischaemic attack (TIA). London: Royal College of  
16 Physicians, 2008.  
17

18  
19 8 Giles MF, Flossman E, Rothwell PM. Patient behavior immediately after transient ischemic attack  
20 according to clinical characteristics, perception of the event, and predicted risk of stroke. *Stroke*  
21 2006;37(5):1254-60.  
22

23  
24 9 Hurst K, Lee R, Sideso E, et al. Delays in the presentation to stroke services of patients with transient  
25 ischaemic attack and minor stroke. *Br J Surg* 2016;103(11):1462-6  
26  
27  
28  
29  
30  
31  
32  
33  
34  
35  
36  
37  
38  
39  
40  
41  
42  
43  
44  
45  
46  
47  
48  
49  
50  
51  
52  
53  
54  
55  
56  
57  
58  
59  
60

# BMJ Open

## Delay in patients suspected of transient ischaemic attack: a cross-sectional study

|                                 |                                                                                                                                                                                                                                                                                                                                                                                                                                                                                                      |
|---------------------------------|------------------------------------------------------------------------------------------------------------------------------------------------------------------------------------------------------------------------------------------------------------------------------------------------------------------------------------------------------------------------------------------------------------------------------------------------------------------------------------------------------|
| Journal:                        | <i>BMJ Open</i>                                                                                                                                                                                                                                                                                                                                                                                                                                                                                      |
| Manuscript ID                   | bmjopen-2018-027161.R1                                                                                                                                                                                                                                                                                                                                                                                                                                                                               |
| Article Type:                   | Research                                                                                                                                                                                                                                                                                                                                                                                                                                                                                             |
| Date Submitted by the Author:   | 27-Dec-2018                                                                                                                                                                                                                                                                                                                                                                                                                                                                                          |
| Complete List of Authors:       | Dolmans, Louis; University Medical Center Utrecht, Julius Center for Health Sciences and Primary Care<br>Kappelle, Jaap; University Medical Center Utrecht, Neurology<br>Bartelink, Marie-Louise; University Medical Center Utrecht, Julius Center for Health Sciences and Primary Care<br>Hoes, Arno; University Medical Center Utrecht, Julius Center for Health Sciences and Primary Care<br>Rutten, Frans; University Medical Center Utrecht, Julius Center for Health Sciences and Primary Care |
| <b>Primary Subject Heading</b>: | Neurology                                                                                                                                                                                                                                                                                                                                                                                                                                                                                            |
| Secondary Subject Heading:      | General practice / Family practice                                                                                                                                                                                                                                                                                                                                                                                                                                                                   |
| Keywords:                       | Stroke < NEUROLOGY, NEUROLOGY, Organisation of health services < HEALTH SERVICES ADMINISTRATION & MANAGEMENT                                                                                                                                                                                                                                                                                                                                                                                         |
|                                 |                                                                                                                                                                                                                                                                                                                                                                                                                                                                                                      |

SCHOLARONE™  
Manuscripts



1  
2  
3 **1 Delay in patients suspected of transient ischaemic attack: a cross-sectional**  
4 **2 study**  
5  
6

7 3

8  
9  
10 **4 L Servaas Dolmans<sup>1</sup>, L Jaap Kappelle<sup>2</sup>, Marie-Louise EL Bartelink<sup>1</sup>, Arno W Hoes<sup>1</sup>, Frans H**  
11  
12 **5 Rutten<sup>1</sup>**  
13

14 6

15  
16 <sup>1</sup>Julius Center for Health Sciences and Primary Care, University Medical Center Utrecht, Utrecht University,  
17  
18 Utrecht, The Netherlands

19  
20 <sup>2</sup>Department of Neurology, University Medical Center Utrecht, Utrecht University, Utrecht, The Netherlands  
21  
22

23 10

24  
25  
26  
27 11

28  
29  
30 12

31  
32  
33 **13 L Servaas Dolmans, MD (corresponding author)**  
34

35  
36 14 Julius Center for Health Sciences and Primary Care, University Medical Center Utrecht, Utrecht  
37  
38 University  
39

40  
41 16 PO Box 85500, Stratenum 6.131 3508 GA Utrecht, The Netherlands  
42  
43

44  
45 17 Phone: ++31 88 7568159  
46

47  
48 18 E-mail: L.S.Dolmans@umcutrecht.nl  
49

50  
51 19 Internet: [www.juliuscenter.nl](http://www.juliuscenter.nl)  
52

53 20

54  
55 **21 Word count: 1571**  
56  
57  
58  
59  
60

## 22 Abstract

23

## 24 Objectives

25 Suspected Transient Ischaemic Attack (TIA) necessitates an urgent neurological consultation and a rapid  
26 start of antiplatelet therapy to reduce the risk of early ischaemic stroke following a TIA. Guidelines for  
27 general practitioners (GPs) emphasise the urgency to install preventive treatment as soon as possible.  
28 We aimed to give a contemporary overview of both patient and physician delay.

## 29 Methods

30 A survey at two rapid-access TIA outpatient clinics in Utrecht, The Netherlands. All patients suspected of  
31 TIA were interviewed to assess time delay to diagnosis and treatment, including the time from symptom  
32 onset to i) the first contact with a medical service (patient delay), ii) consultation of the GP and iii)  
33 assessment at the TIA outpatient clinic. We used the diagnosis of the consulting neurologist as  
34 reference.

## 35 Results

36 Of 93 included patients, 43 (46.2%) received a definite, 13 (14.0%) a probable, 11 (11.8%) a possible and  
37 26 (28.0%) no diagnosis of TIA. The median time from symptom onset to the visit to the TIA service was  
38 114.5 (IQR 44.0-316.6) hours. Median patient delay was 17.5 (IQR 0.8-66.4) hours, with a delay of more  
39 than 24 hours in 36 (38.7%) patients. The GP was first contacted in 76 (81.7%) patients, and median time  
40 from first contact with the GP practice to the actual GP consultation was 2.8 (0.5-18.5) hours. Median  
41 time from GP consultation to TIA service visit was 40.8 (IQR 23.1-140.7) hours. Of the 62 patients naïve  
42 to antithrombotic medication who consulted their GP, 27 (43.5%) received antiplatelet therapy.

## 43 Conclusions

44 There is substantial patient and physician delay in the process of getting a confirmed TIA diagnosis,  
45 resulting in suboptimal prevention of an early ischemic stroke.

46

47 **Key words:** TIA, minor stroke, patient delay, physician delay

48

49

50

51

52

53

54

55

### 53 **Strengths and limitations of this study**

- 54 • We interviewed patients suspected of TIA before the definite diagnosis was established, thus  
55 without bias caused by knowledge of the final diagnosis.
- 56 • We were able to provide precise estimates of the different components of the total pre-hospital  
57 delay time.
- 58 • We also assessed whether antiplatelet therapy was initiated prior to the neurologist's  
59 assessment.
- 60 • In 11 of 93 cases we used an expert panel to determine the diagnosis of TIA, in absence of a  
61 conclusion of the consulting neurologist.
- 62 • Our cohort is relatively small, but large enough to provide these estimates of current time delay  
63 in patients suspected of TIA.

64

65

66

67

68

69

70

71

72

73

74

75

76

77

78

79

80

## 81 Introduction

82 A Transient Ischaemic Attack (TIA) is a medical emergency, as the risk of a subsequent ischaemic stroke  
83 following a TIA is highest in the early stage. Urgent neurological consultation followed by proper stroke  
84 preventive treatment reduces this risk substantially, with the rapid start of an antiplatelet agent as key  
85 intervention.[1, 2]

86 Previous studies indicated that around 30 to 40% of patients with TIA delay contacting a medical service  
87 for more than 24 hours.[1, 3, 4, 5] Over the past decade, patient awareness campaigns like 'ACT FAST'  
88 aimed for better recognition of and a quick response to symptoms suspected of stroke to enable  
89 thrombolysis or invasive treatment within the first hours.[6] Although TIA is part of the acute ischaemic  
90 brain spectrum, it is uncertain whether campaigns like this also positively affect acting upon symptoms  
91 that are transient, typically short-lasting and often less distinct. A before and after evaluation of the  
92 'ACT FAST' showed an improvement of patient delay in stroke patients, but in patients with a TIA or  
93 minor stroke there was no improvement in use of emergency medical services or time to first seeking  
94 medical attention within 24 hours [7].

95 The EXPRESS study (2007) laid the foundation for a drastic decrease of physician delay to diagnosis and  
96 treatment of TIA, i) by the development of rapid-access TIA services, and ii) guidelines for general  
97 practitioners (GPs).[1, 8] The Dutch GP guidelines recommend GPs to refer all patients suspected of TIA  
98 to a TIA service within 24 hours, and to immediately initiate a platelet aggregation inhibitor, unless it is  
99 certain that the patient will be examined by a neurologist on the same day.[9] The UK GP guidelines  
100 emphasise an immediate start of medication by the GP in any suspected TIA patient, and have  
101 recommended the use of the prognostic ABCD2 score (Age, Blood pressure, Clinical features, Duration,  
102 Diabetes) to define high-risk patients that have to be examined by the neurologist within 24 hours.[10]  
103 However, in the latest update of the UK national clinical guideline for stroke in 2016 the use of the  
104 ABCD2 score was abandoned, since new studies showed that the ABCD2 is an inaccurate predictor of  
105 early stroke.[11, 12, 13] This guideline now also recommends to refer all suspected TIA patients to a TIA  
106 service within 24 hours.

107 We aimed to assess current patient and physician delay from onset of suspected TIA symptoms to  
108 specialist consultation.

109

110

111

112

113

114

## 115 **Methods**

116 We conducted a survey among patients suspected of TIA who were referred to one of two participating  
117 rapid-access TIA services in the city of Utrecht, The Netherlands. Availability of TIA services in the  
118 Netherlands is restricted to weekdays. During 6 months in the period 2013-2014, consecutive patients  
119 were asked to participate when arriving at the TIA service. Patients were excluded in the case of: (1)  
120 ongoing symptoms; (2) onset of symptoms in-hospital or outside the Netherlands; (3) severe cognitive  
121 impairment; (4) inability to clarify the time of onset of symptoms.

122 Participants suspected of TIA were interviewed at the start of their day at the TIA service before  
123 knowing their final diagnosis. We collected information about the following items in a standardized  
124 questionnaire (included as a supplementary file): (1) the interval from onset of symptoms to the  
125 patient's first contact with a medical service (patient delay), the interval to the GP visit, and the interval  
126 to the TIA service visit; (2) the initiation of an antiplatelet agent; (3) the type and duration of symptoms;  
127 (4) the initial reaction of the patient (what did the patient do?); (5) the initial perception (what did the  
128 patient think?); (6) general knowledge of TIA. Responses were written down by the interviewer. In case  
129 a patient had experienced multiple recent (suspected) TIAs, we evaluated the last event.

130 We considered the consulting neurologist's diagnosis of TIA as reference. Diagnoses were categorised as  
131 definite TIA or minor stroke, probable TIA, possible TIA, or no TIA. In 11 cases (11.8%) the neurologist's  
132 conclusion was unclear or absent, and three clinicians (LSD,LJK, FHR) decided in a consensus meeting on  
133 the diagnosis.

134 In this observational study, with estimations of delay, a method for sample size calculation is lacking. We  
135 therefore included a convenient number of participants.

136 Delay is presented as median with 25-75% interquartile range (IQR). We used Mann-Whitney U tests for  
137 comparing delay across subgroups. In an overview of results per interview item, we additionally  
138 compared results between those with a definite or probable TIA (or minor stroke), and those with no or  
139 a possible TIA, applying Chi square tests.

### 140 *Patient and public involvement*

141 There were no patients or public involved in the design or conduct of this study.

142

143

144

145

146

147

## 148 Results

149 A total of 103 patients consented to participate. Ten patients were excluded because of: i) ongoing  
 150 symptoms (n=3), ii) onset of symptoms in-hospital or abroad (n=2), iii) an unclear onset of symptoms  
 151 (n=3), and iv) severe cognitive impairment (n=2). Table 1 shows characteristics of the 93 participants.  
 152 Mean (SD) age was 65.2 (13.4) years and 55 (59.1%) were male. The median time from symptom onset  
 153 to our interview at the TIA service was 4.8 (IQR 1.8 – 13.2) days. Table 2 shows an overview of the  
 154 different parts of time delay to the assessment at the TIA service.

155 **Table 1. Patient characteristics of 93 patients suspected of TIA**

| Characteristics                                                | Total<br>(N = 93) |
|----------------------------------------------------------------|-------------------|
| Mean age in years (SD)                                         | 65.2 (13.4)       |
| Male, n (%)                                                    | 55 (59.1)         |
| Prior TIA/ischaemic stroke, n (%)                              | 23 (24.7)         |
| Living situation, n (%)                                        |                   |
| Alone                                                          | 25 (26.9)         |
| With a partner                                                 | 66 (71.0)         |
| In a nursing home                                              | 2 (2.1)           |
| Weekend onset of symptoms, n (%)                               | 31 (33.3)         |
| Symptoms, n (%) *                                              |                   |
| Motor                                                          | 32 (34.4)         |
| Sensory                                                        | 21 (22.6)         |
| Visual                                                         | 27 (29.0)         |
| Speech                                                         | 30 (32.3)         |
| Median duration of neurological deficits in hours (25-75% IQR) | 0.5 (0.1 – 2.4)   |
| Diagnosis, n (%) **                                            |                   |
| TIA or minor stroke                                            | 43 (46.2)         |
| Probably TIA                                                   | 13 (14.0)         |
| Possibly TIA                                                   | 11 (11.8)         |
| No TIA (TIA mimic)                                             | 26 (28.0)         |

156 \* Patients may have experienced more than one symptom

157 \*\* In 11 patients the definite diagnosis was made by a panel consisting of three of the authors.

158 TIA, Transient Ischaemic Attack; IQR, interquartile range.

159

162 **Table 2. Delay for the 93 patients suspected of a TIA.**

163

| Type of delay time                                            | Median time (IQR), hours |
|---------------------------------------------------------------|--------------------------|
| <b>Patient delay</b>                                          |                          |
| Time from symptom onset to first contact with medical service | 17.5 (IQR 0.8-66.4)      |

|                                                               |                        |        |
|---------------------------------------------------------------|------------------------|--------|
| ▪ Onset during weekdays (N=31)                                | 8.8 (IQR 0.5-103.5)    |        |
| Onset during weekend (N=62)                                   | 21.0 (IQR 13.0-65.3)   | p=0.29 |
| ▪ Prior TIA or stroke                                         | 3.0 (IQR 0.8-40.5)     |        |
| No prior TIA or stroke                                        | 19.0 (IQR 1.0-67.5)    | p=0.29 |
| <b>GP delay</b>                                               |                        |        |
| Time from contact with GP to actual GP consultation (N=76)    | 2.8 (0.5-18.5)         |        |
| ▪ GP during office hours (N=69)                               | 3.0 (0.5-9.5)          |        |
| GP out of hours service (N=7)                                 | 1.4 (0.4-7.8)          | p=0.34 |
| <b>Referral delay</b>                                         |                        |        |
| Time from GP consultation to assessment at TIA service (N=76) | 40.8 (IQR 23.1-140.7)  |        |
| ▪ GP during office hours (N=69)                               | 30.5 (IQR 23.2-141.3)  |        |
| GP out of hours service (N=7)                                 | 58.4 (IQR 13.7-96.4)   | p=0.62 |
| ▪ History of TIA/ stroke                                      | 105.0 (IQR 27.3-228.8) |        |
| No history of TIA/stroke                                      | 30.0 (IQR 22.5-98.5)   | p=0.09 |
| <b>Total delay</b>                                            |                        |        |
| Time from symptom onset to assessment at TIA service          | 114.5 (IQR 44.0-316.6) |        |

IQR, interquartile range; TIA, transient ischaemic attack; GP, general practitioner.

### 167 Patient delay

168 The median delay from symptoms to the first contact with a medical service was 17.5 (IQR 0.8-  
 169 66.4) hours and did not differ significantly between patients with definite or probable TIA/minor  
 170 stroke (19.0 (IQR 0.9-63.2) hours) and those with possible or no TIA (16.6 (IQR 0.7-92.4) hours).  
 171 Thirty-six (38.7%) patients delayed seeking medical help for more than 24 hours. In 76 (81.7%)  
 172 patients, the GP was the first contacted healthcare provider; in 7/76 (9.2%) during out of office  
 173 hours. The emergency department or ambulance service was contacted directly by seven patients  
 174 (7.5%) and ten patients (10.8%) first reported their symptoms to a medical specialist (other than a  
 175 neurologist) via an outpatient clinic. In total, four (4.3%) patients had experienced similar symptoms in  
 176 the previous three months, however, without contacting a health care provider.

177 In the 31 (33,3%) patients with symptom initiation during the weekend patient delay was 21.0 (IQR 13.0-  
 178 65.3) hours, and 8.8 (IQR 0.5-103.5) hours in those with symptoms during weekdays (p=0.29). Patients  
 179 who had had a prior TIA or stroke (n=23, 24.7%) contacted the GP in 78.3% of cases (during office hours,  
 180 n=17; GP out of hours service, n=1), and the median delay to first contact was 3.0 (IQR 0.8-40.5) hours,  
 181 which was lower than in those without prior TIA/stroke; 19.0 (IQR 1.0-67.5) hours, p=0.29.

### 182 Delays until consultation at the TIA service

183 Among the 76 patients who contacted the GP, the median time from onset of symptoms to the actual  
 184 GP consultation was 25.5 (IQR 4.0-128.0) hours. The (median) GP delay, i.e. the time from the first  
 185 contact by the patient with the GP practice to the actual GP consultation, was 2.8 (0.5-18.5) hours. The  
 186 subsequent median time from GP consultation to the consultation at the TIA service (referral delay) was  
 187 40.8 (IQR 23.1-140.7) hours.

188 In the patients who consulted their own GP during office hours (n=69), referral delay was 30.5 (IQR 23.2-  
 189 141.3); in the patients who (first) consulted a GP out of hours service (n=7) this was 58.4 (IQR 13.7-96.4)  
 190 hours (p=0.62). The referral delay was 105.0 (IQR 27.3-228.8) hours in the 23 (24.7%) patients who had a  
 191 prior TIA or stroke, and 30.0 (IQR 22.5-98.5) in those without prior TIA/stroke (p=0.09).

192 For the complete cohort, the median time from onset of symptoms to the visit to the TIA service was  
 193 114.5 (IQR 44.0-316.6) hours. Figure 1 shows the proportions of patients that contacted a medical  
 194 service, visited the GP, and visited the TIA service, at subsequent points in time from symptom onset.

195 Of the 62 patients who were naïve to antithrombotic medication, 27 (43.5%) received a platelet  
 196 aggregation inhibitor from the GP prior to the TIA service visit. Comparing these 27 patients with the 35  
 197 patients that did not receive a platelet inhibitor, both the delay from GP to the neurologist's assessment  
 198 (32.7 (22.1-94.6) vs 30.0 (22.3-141.0) hours) and the distribution of definite diagnoses (8/27 (29.6%) vs  
 199 10/35 (28.6%) diagnosed as no TIA) were similar.

#### 200 *Initial patient's response and perception of symptoms*

201 Data on the initial response, perception of symptoms, and the (general) knowledge of TIA are  
 202 summarised in Table 3. Fifty-four (58.1%) patients initially decided to 'wait and see'. Sixty-five patients  
 203 (69.9%) did not call for medical help within the first hour after symptom onset. The main reasons for not  
 204 calling were disappearance of symptoms (27/65, 42.4%), and not considering the symptoms to be  
 205 threatening (15/65, 23.4%).

206 Thirty (32.3%) patients interpreted their symptoms as a medical emergency. Asking about initial  
 207 thoughts on the possible cause of their symptoms, 65 (60.2%) did not consider a TIA. Most patients were  
 208 familiar with the medical term TIA (76/93, 87.1%), but 40 (43.0%) patients had no or an incorrect idea  
 209 about the symptoms related to TIA.

210 **Table 3. Initial response, perception of symptoms, and general knowledge of TIA, in 93**  
 211 **patients suspected of TIA, divided in those with a certain or probably TIA/minor stroke,**  
 212 **and in those with no or possibly TIA according to the neurologist\*.**

| Interview item                      | Total<br>(N = 93) | Certain or probable<br>TIA/minor stroke<br>(N = 48) | No or possibly<br>TIA/minor stroke<br>(N = 34) |
|-------------------------------------|-------------------|-----------------------------------------------------|------------------------------------------------|
|                                     | n (%)             | n (%)**                                             | n (%)**                                        |
| <i>Initial response to symptoms</i> |                   |                                                     |                                                |
| <b>Initial response</b>             |                   |                                                     |                                                |



|                                                                       |           |           |           |
|-----------------------------------------------------------------------|-----------|-----------|-----------|
| Wait and see                                                          | 54 (58.1) | 27 (56.3) | 20 (58.8) |
| Direct call to health care provider                                   | 18 (19.4) | 8 (16.7)  | 6 (17.7)  |
| Asking a relative for advice                                          | 17 (18.3) | 10 (20.8) | 7 (20.6)  |
| Other                                                                 | 4 (4.4)   | 3 (6.2)   | 1 (2.9)   |
| <b>Reasons for not seeking medical attention within 1 hour (N=65)</b> |           |           |           |
| Symptoms had disappeared                                              | 27 (41.5) | 15 (45.5) | 10 (41.7) |
| Symptoms not considered as threatening                                | 15 (23.1) | 8 (24.2)  | 6 (25.0)  |
| Convinced that symptoms would resolve spontaneously                   | 9 (13.8)  | 4 (12.1)  | 3 (12.5)  |
| Because it occurred during out of office hours                        | 4 (6.2)   | 2 (6.1)   | 1 (4.2)   |
| Other                                                                 | 10 (15.4) | 4 (12.1)  | 4 (16.6)  |
| <b>Perception of symptoms</b>                                         |           |           |           |
| Interpreted as an emergency                                           | 30 (32.3) | 17 (35.4) | 8 (23.5)  |
| Considered a TIA as possible cause                                    | 37 (39.8) | 16 (33.3) | 14 (41.2) |
| Experienced severity of symptoms on a scale from 0 to 10 (N=90)       |           |           |           |
| 1 to 4                                                                | 32 (35.6) | 15 (32.6) | 16 (48.5) |
| 5 to 7                                                                | 35 (38.9) | 20 (43.5) | 9 (27.3)  |
| 8 to 10                                                               | 23 (25.5) | 11 (23.9) | 8 (24.2)  |
| <b>Knowledge of TIA</b>                                               |           |           |           |
| Ever heard of a TIA                                                   | 76 (87.1) | 35 (72.9) | 30 (88.2) |
| Correctly knowing key TIA symptoms                                    | 63 (57.0) | 24 (50.0) | 20 (58.8) |
| Considers rapid treatment (within 24 hrs) necessary                   | 54 (58.1) | 25 (52.1) | 22 (64.7) |
| Knows that TIA may be a precursor of stroke                           | 44 (47.3) | 22 (45.8) | 17 (50.0) |

\* In 11 patients a definite neurologist's diagnosis could not be retrieved from the medical files.

\*\*No significant differences between the 'certain or probable TIA/minor stroke' patients and 'no or possible TIA' patients were found, applying Chi square tests.

TIA, Transient Ischaemic Attack.

## 225 Discussion

226 The majority of patients with symptoms suspected of a TIA in this outpatient population delayed seeking  
227 medical help, resulting in a delay of more than 24 hours in 38.7% of patients (median 17.5 (IQR 0.8-  
228 66.4)). Although the actual GP consultation took place after a median of only 2.8 (0.5-18.5) hours from  
229 the first contact with the GP practice (GP delay), it took another 40.8 (IQR 23.1-140.7) hours before the  
230 patient was seen at the TIA clinic (referral delay). Only a minority (43.5%) of patients naïve to  
231 antithrombotic medication received an antiplatelet agent from the GP prior to the assessment by the  
232 neurologist.

233 The extent of patient delay in our study corresponds with the delay reported in previous studies from  
234 the UK, published between 2006 and 2016.[1, 3-5, 14, 15] Both the Dutch and British health care system  
235 have a strong primary care system and rapid-access TIA services. In the Netherlands there have been  
236 campaigns promoting recognition of stroke symptoms similar to the UK 'ACT FAST' campaign. Our  
237 results indicate that during the last decade no clear reduction in patient delay was achieved, despite  
238 these campaigns explaining the most important stroke symptoms and stressing its urgency. As in the UK  
239 studies, we found that a majority of patients or their relatives do not respond (directly) to transient  
240 symptoms that could be caused by brain ischaemia. The disappearance of symptoms was the main  
241 reason for delay, followed by considering the symptoms as not threatening. Even though most  
242 participants were familiar with the medical term TIA, a minority actually considered the diagnosis.

243 Given the time from symptom onset to the visit of the rapid-access TIA service it can be concluded that  
244 there is room for improvement of the current Dutch system of TIA management. In everyday practice  
245 the guidelines' recommendation of an assessment by the neurologist at a rapid-access TIA service the  
246 same or next day is not met. The strong gatekeeper's function of the GPs in the Dutch healthcare system  
247 has beneficial effects on selection of referral and health budgets, however, it may also cause undesirable  
248 delays in those who actually had a TIA.

249 Beyond limiting the delay to a complete diagnostic assessment to identify etiological factors like  
250 atrial fibrillation or significant carotid stenosis, probably the most crucial step forward is  
251 initiating secondary prevention with antiplatelets in the pre-hospital setting. Recent guidelines  
252 clearly recommended immediate initiation of antiplatelets in patients suspected of TIA, but our  
253 study shows there is still insufficient awareness among GPs of this requirement: only in 44% of  
254 patients with a suspected TIA antiplatelets were initiated. Unlike the UK guidelines that  
255 recommend GPs to start such treatment in any suspected TIA patient, the Dutch guidelines  
256 recommend GPs to start only if assessment by the neurologist is not feasible the same day. We  
257 consider a clear-cut recommendation to start an antiplatelet in any suspected TIA patient (naïve  
258 to antithrombotics) as the best option.

259 If all GPs would follow the recommendation on antiplatelet therapy, the delay time to treatment would  
260 only be 2.8 (0.5-18.5) hours. We therefore consider enforcing this recommendation more important

1  
2  
3 261 than the recommendation on assessment by the neurologist within 24 hours. Our results help to  
4 262 convince GPs that more timely action is needed in patients suspected of TIA.

6 263 An alternative care system would be the 'French' model with (i) a 24/7 TIA rapid-access service and (ii)  
7 264 public campaigns raising awareness among lay people that every acute neurological deficit should be  
8 265 considered a medical emergency similarly to acute chest pain, also requiring ambulance transportation,  
9 266 certainly if symptoms persist (possibly stroke). However, this would mean a large shift in the  
10 267 organisation of health care in the Netherlands, a large increase in health care costs.

13  
14 268 One of the strengths of our study is that we were able to provide precise estimates of the different  
15 269 components of pre-hospital delay. Moreover, we interviewed not only those with definite TIA, but the  
16 270 larger domain of suspected TIA cases, importantly, before the definite diagnosis was established and  
17 271 without bias caused by this knowledge. Recall errors still need to be considered. A limitation was that in  
18 272 11.8% of cases presence or absence of TIA was determined in consensus by a panel based only on  
19 273 history taking, that is without the conclusion of the consulting neurologist.

22 274 Our study indicates that there is still a need for both patient and physician education regarding the  
23 275 required urgency in case of a suspected TIA. Lay people need to be better informed that also mild  
24 276 stroke-like symptoms that quickly disappear have to be reported to a physician as soon as possible. GPs  
25 277 should be better educated about the rationale for an early start of antiplatelet therapy and that they  
26 278 can safely install this medication. Furthermore, neurologists should advocate the early start of  
27 279 treatment during their contacts with GPs. Further research is needed to explore the main determinants  
28 280 of patient delay and the main reasons for the lack of prescribing antiplatelet therapy by GPs.

## 32 281 **Conclusion**

34 282 Current patient and physician delay in suspected TIA is considerable. Our results emphasise the need for  
35 283 both patient and physician education, aimed at quick consultation at a TIA outpatient clinic and an early  
36 284 start of secondary prevention by GPs in any case of a suspected TIA.

39 285

41 286

43 287

45 288

47 289

49 290

51 291

53 292

55

56

57

58

59

60

1  
2  
3 2934  
5 2946  
7 295 **Contributors**8  
9 296 LD is PhD candidate and the primary researcher. LD and FR drafted the manuscript. MB, LK and AW have  
10 297 revised it critically, and all authors approved the final manuscript.11  
12  
13 298 **Funding**14  
15 299 The primary researcher (drs. L.S. Dolmans) performed this study as a general practitioner in training, and  
16 300 combined his training with a PhD track. 'Stichting Beroepsopleiding Huisartsen (SBOH)', employee of  
17 301 Dutch GP trainees (financially) supported the PhD track.18  
19  
20 302 **Competing interests**21  
22 303 None declared.23  
24 304 **Patient consent**25  
26 305 No written informed consent procedure required. Data were collected with immediate de-identification  
27 306 at the patient interview.28  
29  
30 307 **Ethics Approval**31  
32 308 This study was approved by the Medical Research Ethics Committee of the University Medical Center of  
33 309 Utrecht, the Netherlands. Formal ethical approval was not required and the committee waived the  
34 310 requirement to obtain formal informed consent. All participants gave their oral consent.35  
36  
37 311 **Data sharing statement**38  
39 312 No additional data available.40  
41 31342  
43 31444  
45 31546  
47 31648  
49 31750  
51 31852  
53 31954  
55 32056  
57  
58  
59  
60

321

322

323 **References**

324 1 Rothwell PM, Giles MF, Chandratheva A, et al. Effect of urgent treatment of transient ischaemic attack  
325 and minor stroke on early recurrent stroke (EXPRESS study): a prospective population-based sequential  
326 comparison. *Lancet* 2007;370(9596):1432-42.

327 2 Rothwell PM, Algra A, Chen Z, et al. Effect of aspirin on risk and severity of early recurrent stroke after  
328 transient ischaemic attack and ischaemic stroke: time-course analysis of randomised trials. *Lancet*  
329 2016;388(10042):365-375.

330 3 Sprigg N, Machili C, Otter ME, et al. A systematic review of delays in seeking medical attention after  
331 transient ischaemic attack. *J Neurol Neurosurg Psychiatry* 2009;80(8):871-875.

332 4 Chandratheva A, Lasserson DS, Geraghty OC, et al. Population-based study of behavior immediately  
333 after transient ischemic attack and minor stroke in 1000 consecutive patients: lessons for public  
334 education. *Stroke* 2010;41(6):1108-14.

335 5 Wilson AD, Coleby D, Taub NA, et al. Delay between symptom onset and clinic attendance following  
336 TIA and minor stroke: the BEATS study. *Age Ageing* 2014;43(2):253-6.

337 6 Flynn D, Ford GA, Rodgers H, et al. A time series evaluation of the FAST National Stroke Awareness  
338 Campaign in England. *PLoS One* 2014;9(8):e104289.

339 7 Wolters FJ, Li L, Gutnikov SA, et al. Medical attention seeking after transient ischemic attack and minor  
340 stroke before and after the UK Face, Arm, Speech, Time (FAST) public education campaign: Results from  
341 the Oxford Vascular Study. *JAMA Neurol* 2018;75(10):1225-1233.

342 8 Kamal N, Hill MD, Blacchiere DP, et al. Rapid assessment and treatment of transient ischemic attacks  
343 and minor stroke in Canadian emergency departments: time for a paradigm shift. *Stroke*  
344 2015;46(10):2987-90.

345 9 Verburg AF, Tjon-A-Tsien MR, Verstappen WH, et al. [Summary of the 'Stroke' guideline of the Dutch  
346 College of General Practitioners' (NHG)]. *Ned Tijdschr Geneesk* 2014;158(1):A7022.

347 10 National Collaborating Centre for Chronic Conditions. Stroke: national clinical guideline for diagnosis  
348 and initial management of acute stroke and transient ischaemic attack (TIA). London: Royal College of  
349 Physicians, 2008.

350 11 Rudd AG, Bowen A, Youn GR, et al. The latest national clinical guideline for stroke. *Clin Med (Lond)*  
351 2017;17(2):154-155.

352 12 Hill MD, Weir NU. Is the ABCD score truly useful? *Stroke* 2006;37(7):1636.

- 1  
2  
3 353 13 Perry JJ, Sharma M, Sivilotti ML, et al. Prospective validation of the ABCD2 score for patients in the  
4 354 emergency department with transient ischemic attack. *CMAJ* 2011;183(10):1137-1145.  
5  
6 355 14 Giles MF, Flossman E, Rothwell PM. Patient behavior immediately after transient ischemic attack  
7 356 according to clinical characteristics, perception of the event, and predicted risk of stroke. *Stroke*  
8 357 2006;37(5):1254-60.  
9  
10  
11 358 15 Hurst K, Lee R, Sideso E, et al. Delays in the presentation to stroke services of patients with transient  
12 359 ischaemic attack and minor stroke. *Br J Surg* 2016;103(11):1462-6  
13  
14 360  
15  
16 361  
17  
18 362  
19  
20 363  
21  
22 364  
23  
24 365  
25  
26 366  
27  
28 367  
29  
30 368

31 **Figure legend:**

32  
33  
34 369 **Caption: Figure 1. Proportions of patients that contacted a medical service, visited the GP, and the TIA**  
35 370 **outpatient clinic, at subsequent points in time from symptom onset.**

36  
37 371 Legend: GP, general practitioner; TIA, Transient Ischaemic Attack.  
38  
39 372  
40  
41 373  
42  
43  
44  
45  
46  
47  
48  
49  
50  
51  
52  
53  
54  
55  
56  
57  
58  
59  
60

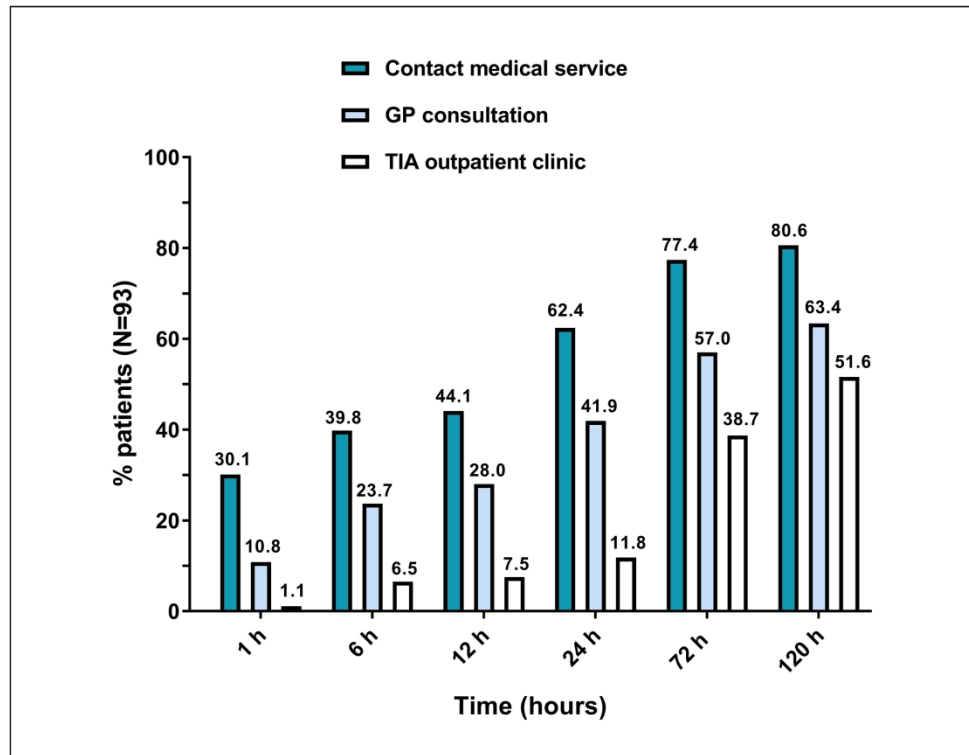

Caption : Figure 1. Proportions of patients that contacted a medical service, visited the GP, and the TIA outpatient clinic, at subsequent points in time from symptom onset. Legend below: GP, general practitioner; TIA, Transient Ischaemic Attack.

120x111mm (600 x 600 DPI)

## Questionnaire – Delay in patients suspected of TIA

-Translated from Dutch-

### Time points for determining delay

|   |                                                                                                                                                                                                                                                                                                                                                                                                                                                             |
|---|-------------------------------------------------------------------------------------------------------------------------------------------------------------------------------------------------------------------------------------------------------------------------------------------------------------------------------------------------------------------------------------------------------------------------------------------------------------|
| 1 | When did the symptoms start?<br><br>Date __ - __ - __ time __. __ h                                                                                                                                                                                                                                                                                                                                                                                         |
| 2 | Who did you tell first about the symptoms?<br><ul style="list-style-type: none"> <li>a. Relative or friend</li> <li>b. Relative or friend with medical knowledge</li> <li>c. Medical institution <ul style="list-style-type: none"> <li>i. General practice</li> <li>ii. GP out of hours service</li> <li>iii. Emergency department</li> <li>iv. Ambulance service</li> <li>v. Other</li> </ul> </li> </ul><br>This was at: date __ - __ - __ time __. __ h |
| 3 | If question 2 was answered with a or b:<br>Your first contact with a medical service was with?<br><ul style="list-style-type: none"> <li>a. General practice</li> <li>b. GP out of hours service</li> <li>c. Emergency department</li> <li>d. Ambulance service</li> <li>e. Other</li> </ul><br>This was at: date __ - __ - __ time __. __ h                                                                                                                |
| 4 | The moment you made an appointment with the GP was at?<br><br>Date __ - __ - __ time __. __ h                                                                                                                                                                                                                                                                                                                                                               |
| 5 | The GP consultation was at?<br><br>Date __ - __ - __ time __. __ h                                                                                                                                                                                                                                                                                                                                                                                          |
| 6 | The TIA outpatient clinic visit was at?<br><br>Date __ - __ - __ time __. __ h                                                                                                                                                                                                                                                                                                                                                                              |



## Clinical characteristics, knowledge, interpretation and response to symptoms

|   |                                                                                                                                                                                                                                                                                                                                                                                                                                                                                                                                                                                                                                                                                                                                                                                                                                                       |
|---|-------------------------------------------------------------------------------------------------------------------------------------------------------------------------------------------------------------------------------------------------------------------------------------------------------------------------------------------------------------------------------------------------------------------------------------------------------------------------------------------------------------------------------------------------------------------------------------------------------------------------------------------------------------------------------------------------------------------------------------------------------------------------------------------------------------------------------------------------------|
| 1 | <p><i>Patient characteristics</i></p> <ol style="list-style-type: none"> <li>a. Age: ___ years</li> <li>b. Sex: male / female</li> <li>c. History of TIA or stroke?             <ol style="list-style-type: none"> <li>i. Yes</li> <li>ii. No</li> </ol> </li> <li>d. Living situation             <ol style="list-style-type: none"> <li>i. Alone</li> <li>ii. With a partner or relatives</li> <li>iii. Nursing or care home</li> </ol> </li> <li>e. Highest level of education? (<i>the original version includes Dutch levels of education</i>)             <ol style="list-style-type: none"> <li>i. Primary education</li> <li>ii. Lower secondary education</li> <li>iii. Upper secondary education</li> <li>iv. Post-secondary non-tertiary education</li> <li>v. Tertiary education</li> <li>vi. Other, namely: _____</li> </ol> </li> </ol> |
| 2 | <p><i>Knowledge of TIA before the event</i></p> <p>Were you familiar with TIA before this episode?</p> <ol style="list-style-type: none"> <li>a. No</li> <li>b. Yes             <ol style="list-style-type: none"> <li>i. What are signs or symptoms of a TIA?                 <ol style="list-style-type: none"> <li>1. No idea</li> <li>2. The following: _____<br/>_____</li> </ol> </li> <li>ii. A TIA can be a precursor of a certain disease. What disease?                 <ol style="list-style-type: none"> <li>1. No idea</li> <li>2. Precursor of: _____</li> </ol> </li> </ol> </li> </ol> <p>Did you think a TIA requires urgent medical assessment?</p> <ol style="list-style-type: none"> <li>a. Yes</li> <li>b. No</li> <li>c. Does not know</li> </ol>                                                                               |
| 3 | <p><i>Symptoms experienced</i></p> <ol style="list-style-type: none"> <li>a. Type of symptoms?<br/>Was/where there:             <ol style="list-style-type: none"> <li>i. Paresis, weakness of:                 <ol style="list-style-type: none"> <li>1. Face</li> <li>2. Arm/hand</li> <li>3. Leg/foot</li> </ol> </li> </ol> </li> </ol>                                                                                                                                                                                                                                                                                                                                                                                                                                                                                                           |

Left/right

ii. Numbness/paresthesia of:

1. Face
2. Arm/hand
3. Leg/foot

Left/right

iii. Visual impairment/symptoms:

1. Diplopia
2. Blurry vision (both eyes)
3. Blindness/loss of vision in a part of visual field (both eyes)
4. Blindness/loss of vision in one eye

iv. Communication problem:

1. Impairment of speech or comprehension of language (dyphasia)
2. Slurred speech, problems with articulation/pronunciation (dysarthria)

v. Loss of consciousness

Duration of symptoms? \_\_\_ hours and \_\_\_ min

Can you fully remember what happened?

- i. Yes
- ii. No

b. Did you consider these symptoms to be an emergency?

- i. Yes
- ii. No

c. How severe did you consider these symptoms were?

- i. 1 – 2 – 3 – 4 – 5 – 6 – 7 – 8 – 9 – 10

d. What was your first response to symptoms?

- i. Nothing specific because symptoms quickly resolved
- ii. Wait and see
- iii. I asked a relative or friend for advice

Advice: \_\_\_\_\_

iv. Self-treatment

v. Seeking medical attention

vi. Other: \_\_\_\_\_

e. Did you have an idea what caused the symptoms?

i. No

ii. Yes, namely: \_\_\_\_\_

f. What was the situation at that time?

i. Alone

ii. In company of: \_\_\_\_\_

Did your bystanders considered the event an emergency?

1. Yes
2. No

|                                                                                                                                                                |                                                                                                                                                                                                                                                                                                                                                                                                                                                                                                                                                                                                                                                                              |
|----------------------------------------------------------------------------------------------------------------------------------------------------------------|------------------------------------------------------------------------------------------------------------------------------------------------------------------------------------------------------------------------------------------------------------------------------------------------------------------------------------------------------------------------------------------------------------------------------------------------------------------------------------------------------------------------------------------------------------------------------------------------------------------------------------------------------------------------------|
| 1<br>2<br>3<br>4<br>5<br>6<br>7<br>8<br>9<br>10<br>11<br>12<br>13<br>14<br>15<br>16<br>17                                                                      | <p>g. Did you contact a medical service within one hour?</p> <p>i. Yes</p> <p>ii. No, because:</p> <ol style="list-style-type: none"><li>1. Symptoms resolved</li><li>2. Thought that the symptoms would resolve</li><li>3. Did not consider it severe enough</li><li>4. Others said it could wait</li><li>5. Unable because of the symptoms</li><li>6. Transportation issues</li><li>7. It happened during outside office hours</li><li>8. Other, namely: _____</li></ol>                                                                                                                                                                                                   |
| 18<br>19<br>20<br>21<br>22<br>23<br>24<br>25<br>26<br>27<br>28<br>29<br>30<br>31<br>32<br>33<br>34<br>35<br>36<br>37<br>38<br>39<br>40<br>41<br>42<br>43<br>44 | <p>4 <i>Treatment by the GP, if applicable</i></p> <p>a. Did the GP start any medication?</p> <p>iii. No</p> <p>iv. Yes, namely:</p> <ol style="list-style-type: none"><li>1. Aspirin</li><li>2. Dipyridamole</li><li>3. Anticoagulant</li><li>4. Statin</li><li>5. Antihypertensives</li><li>6. Other, namely: _____</li></ol> <p>b. If not, did you already use antithrombotic, or cardiovascular medication?</p> <p>i. No</p> <p>ii. Yes, namely:</p> <ol style="list-style-type: none"><li>1. Aspirin</li><li>2. Dipyridamole</li><li>3. Anticoagulant</li><li>4. Statin</li><li>5. Antihypertensives</li><li>6. Other, namely: _____</li><li>7. Does not know</li></ol> |

45  
46  
47  
48  
49  
50  
51  
52  
53  
54  
55  
56  
57  
58  
59  
60

GP, general practitioner.

STROBE Statement—Checklist of items that should be included in reports of *cross-sectional studies*

|                              | Item No | Recommendation                                                                                                                                                                                                                                                                                                                                         |
|------------------------------|---------|--------------------------------------------------------------------------------------------------------------------------------------------------------------------------------------------------------------------------------------------------------------------------------------------------------------------------------------------------------|
| <b>Title and abstract</b>    | 1       | (a) Indicate the study's design with a commonly used term in the title or the abstract<br>✓ Page 0/1                                                                                                                                                                                                                                                   |
|                              |         | (b) Provide in the abstract an informative and balanced summary of what was done and what was found<br>✓ Page 1                                                                                                                                                                                                                                        |
| <b>Introduction</b>          |         |                                                                                                                                                                                                                                                                                                                                                        |
| Background/rationale         | 2       | Explain the scientific background and rationale for the investigation being reported<br>✓ Page 3                                                                                                                                                                                                                                                       |
| Objectives                   | 3       | State specific objectives, including any prespecified hypotheses<br>✓ Page 3                                                                                                                                                                                                                                                                           |
| <b>Methods</b>               |         |                                                                                                                                                                                                                                                                                                                                                        |
| Study design                 | 4       | Present key elements of study design early in the paper<br>✓ Page 4                                                                                                                                                                                                                                                                                    |
| Setting                      | 5       | Describe the setting, locations, and relevant dates, including periods of recruitment, exposure, follow-up, and data collection<br>✓ Page 4                                                                                                                                                                                                            |
| Participants                 | 6       | (a) Give the eligibility criteria, and the sources and methods of selection of participants<br>✓ Page 4                                                                                                                                                                                                                                                |
| Variables                    | 7       | Clearly define all outcomes, exposures, predictors, potential confounders, and effect modifiers. Give diagnostic criteria, if applicable<br>✓ Page 4                                                                                                                                                                                                   |
| Data sources/<br>measurement | 8*      | For each variable of interest, give sources of data and details of methods of assessment (measurement). Describe comparability of assessment methods if there is more than one group<br>✓ Page 4/questionnaire as supplementary file                                                                                                                   |
| Bias                         | 9       | Describe any efforts to address potential sources of bias<br>✓ Page 4                                                                                                                                                                                                                                                                                  |
| Study size                   | 10      | Explain how the study size was arrived at<br>✓ Page 4                                                                                                                                                                                                                                                                                                  |
| Quantitative variables       | 11      | Explain how quantitative variables were handled in the analyses. If applicable, describe which groupings were chosen and why<br>✓ Page 4                                                                                                                                                                                                               |
| Statistical methods          | 12      | (a) Describe all statistical methods, including those used to control for confounding<br>(b) Describe any methods used to examine subgroups and interactions<br>(c) Explain how missing data were addressed<br>(d) If applicable, describe analytical methods taking account of sampling strategy<br>(e) Describe any sensitivity analyses<br>✓ Page 4 |
| <b>Results</b>               |         |                                                                                                                                                                                                                                                                                                                                                        |
| Participants                 | 13*     | (a) Report numbers of individuals at each stage of study—eg numbers potentially eligible, examined for eligibility, confirmed eligible, included in the study, completing follow-up, and analysed<br>(b) Give reasons for non-participation at each stage                                                                                              |

|                          |     |                                                                                                                                                                                                                                                                                                                                                                                                                             |
|--------------------------|-----|-----------------------------------------------------------------------------------------------------------------------------------------------------------------------------------------------------------------------------------------------------------------------------------------------------------------------------------------------------------------------------------------------------------------------------|
|                          |     | (c) Consider use of a flow diagram<br>✓ Page 5                                                                                                                                                                                                                                                                                                                                                                              |
| Descriptive data         | 14* | (a) Give characteristics of study participants (eg demographic, clinical, social) and information on exposures and potential confounders<br>(b) Indicate number of participants with missing data for each variable of interest<br>(n.a)<br>✓ Page 5                                                                                                                                                                        |
| Outcome data             | 15* | Report numbers of outcome events or summary measures<br>✓ Page 5/6                                                                                                                                                                                                                                                                                                                                                          |
| Main results             | 16  | (a) Give unadjusted estimates and, if applicable, confounder-adjusted estimates and their precision (eg, 95% confidence interval). Make clear which confounders were adjusted for and why they were included<br>(b) Report category boundaries when continuous variables were categorized<br>(c) If relevant, consider translating estimates of relative risk into absolute risk for a meaningful time period<br>✓ Page 5-7 |
| Other analyses           | 17  | Report other analyses done—eg analyses of subgroups and interactions, and sensitivity analyses<br>✓ Page 8/9                                                                                                                                                                                                                                                                                                                |
| <b>Discussion</b>        |     |                                                                                                                                                                                                                                                                                                                                                                                                                             |
| Key results              | 18  | Summarise key results with reference to study objectives<br>✓ Page 10                                                                                                                                                                                                                                                                                                                                                       |
| Limitations              | 19  | Discuss limitations of the study, taking into account sources of potential bias or imprecision. Discuss both direction and magnitude of any potential bias<br>✓ Page 11                                                                                                                                                                                                                                                     |
| Interpretation           | 20  | Give a cautious overall interpretation of results considering objectives, limitations, multiplicity of analyses, results from similar studies, and other relevant evidence<br>✓ Page 10/11                                                                                                                                                                                                                                  |
| Generalisability         | 21  | Discuss the generalisability (external validity) of the study results<br>✓ Page 10/11                                                                                                                                                                                                                                                                                                                                       |
| <b>Other information</b> |     |                                                                                                                                                                                                                                                                                                                                                                                                                             |
| Funding                  | 22  | Give the source of funding and the role of the funders for the present study and, if applicable, for the original study on which the present article is based<br>✓ Page 11                                                                                                                                                                                                                                                  |

\*Give information separately for exposed and unexposed groups.

**Note:** An Explanation and Elaboration article discusses each checklist item and gives methodological background and published examples of transparent reporting. The STROBE checklist is best used in conjunction with this article (freely available on the Web sites of PLoS Medicine at <http://www.plosmedicine.org/>, Annals of Internal Medicine at <http://www.annals.org/>, and Epidemiology at <http://www.epidem.com/>). Information on the STROBE Initiative is available at [www.strobe-statement.org](http://www.strobe-statement.org).
