# Supplementary material for: Delay in patients suspected of transient ischaemic attack: a cross-sectional study
Source: PubMed Central journal article supplement — BMJ Open. 2019 Feb 27;9(2):e027161. doi: 10.1136/bmjopen-2018-027161 (PMC6398704; doi:10.1136/bmjopen-2018-027161), 2019-02-27
Supplement: bmjopen-2018-027161supp001.pdf [file bmjopen-2018-027161supp001.pdf]

# Questionnaire – Delay in patients suspected of TIA

-Translated from Dutch-

## Time points for determining delay

|   |                                                                                                                                                                                                                                                                                                                           |
|---|---------------------------------------------------------------------------------------------------------------------------------------------------------------------------------------------------------------------------------------------------------------------------------------------------------------------------|
| 1 | When did the symptoms start?<br><br>Date __ - __ - __ time __. __ h                                                                                                                                                                                                                                                       |
| 2 | Who did you tell first about the symptoms?<br>a. Relative or friend<br>b. Relative or friend with medical knowledge<br>c. Medical institution<br>i. General practice<br>ii. GP out of hours service<br>iii. Emergency department<br>iv. Ambulance service<br>v. Other<br><br>This was at: date __ - __ - __ time __. __ h |
| 3 | If question 2 was answered with a or b:<br>Your first contact with a medical service was with?<br>a. General practice<br>b. GP out of hours service<br>c. Emergency department<br>d. Ambulance service<br>e. Other<br><br>This was at: date __ - __ - __ time __. __ h                                                    |
| 4 | The moment you made an appointment with the GP was at?<br><br>Date __ - __ - __ time __. __ h                                                                                                                                                                                                                             |
| 5 | The GP consultation was at?<br><br>Date __ - __ - __ time __. __ h                                                                                                                                                                                                                                                        |
| 6 | The TIA outpatient clinic visit was at?<br><br>Date __ - __ - __ time __. __ h                                                                                                                                                                                                                                            |

## Clinical characteristics, knowledge, interpretation and response to symptoms

|   |                                                                                                                                                                                                                                                                                                                                                                                                                                                                                                                                                                                                                                                                                                                                                                                         |
|---|-----------------------------------------------------------------------------------------------------------------------------------------------------------------------------------------------------------------------------------------------------------------------------------------------------------------------------------------------------------------------------------------------------------------------------------------------------------------------------------------------------------------------------------------------------------------------------------------------------------------------------------------------------------------------------------------------------------------------------------------------------------------------------------------|
| 1 | <p><i>Patient characteristics</i></p> <ul style="list-style-type: none"><li>a. Age: ___ years</li><li>b. Sex: male / female</li><li>c. History of TIA or stroke?<ul style="list-style-type: none"><li>i. Yes</li><li>ii. No</li></ul></li><li>d. Living situation<ul style="list-style-type: none"><li>i. Alone</li><li>ii. With a partner or relatives</li><li>iii. Nursing or care home</li></ul></li><li>e. Highest level of education? (<i>the original version includes Dutch levels of education</i>)<ul style="list-style-type: none"><li>i. Primary education</li><li>ii. Lower secondary education</li><li>iii. Upper secondary education</li><li>iv. Post-secondary non-tertiary education</li><li>v. Tertiary education</li><li>vi. Other, namely: _____</li></ul></li></ul> |
| 2 | <p><i>Knowledge of TIA before the event</i></p> <p>Were you familiar with TIA before this episode?</p> <ul style="list-style-type: none"><li>a. No</li><li>b. Yes<ul style="list-style-type: none"><li>i. What are signs or symptoms of a TIA?<ul style="list-style-type: none"><li>1. No idea</li><li>2. The following:<br/>_____<br/>_____<br/>_____</li></ul></li><li>ii. A TIA can be a precursor of a certain disease. What disease?<ul style="list-style-type: none"><li>1. No idea</li><li>2. Precursor of:<br/>_____</li></ul></li></ul></li></ul> <p>Did you think a TIA requires urgent medical assessment?</p> <ul style="list-style-type: none"><li>a. Yes</li><li>b. No</li><li>c. Does not know</li></ul>                                                                 |
| 3 | <p><i>Symptoms experienced</i></p> <ul style="list-style-type: none"><li>a. Type of symptoms?<br/>Was/where there:<ul style="list-style-type: none"><li>i. Paresis, weakness of:<ul style="list-style-type: none"><li>1. Face</li><li>2. Arm/hand</li><li>3. Leg/foot</li></ul></li></ul></li></ul>                                                                                                                                                                                                                                                                                                                                                                                                                                                                                     |

Left/right

ii. Numbness/paresthesia of:

1. Face
2. Arm/hand
3. Leg/foot

Left/right

iii. Visual impairment/symptoms:

1. Diplopia
2. Blurry vision (both eyes)
3. Blindness/loss of vision in a part of visual field (both eyes)
4. Blindness/loss of vision in one eye

iv. Communication problem:

1. Impairment of speech or comprehension of language (dyphasia)
2. Slurred speech, problems with articulation/pronunciation (dysarthria)

v. Loss of consciousness

Duration of symptoms? \_\_\_ hours and \_\_\_ min

Can you fully remember what happened?

- i. Yes
- ii. No

b. Did you consider these symptoms to be an emergency?

- i. Yes
- ii. No

c. How severe did you consider these symptoms were?

- i. 1 – 2 – 3 – 4 – 5 – 6 – 7 – 8 – 9 – 10

d. What was your first response to symptoms?

- i. Nothing specific because symptoms quickly resolved
- ii. Wait and see
- iii. I asked a relative or friend for advice

Advice: \_\_\_\_\_

iv. Self-treatment

v. Seeking medical attention

vi. Other: \_\_\_\_\_

e. Did you have an idea what caused the symptoms?

- i. No
- ii. Yes, namely: \_\_\_\_\_

f. What was the situation at that time?

- i. Alone
- ii. In company of: \_\_\_\_\_

Did your bystanders considered the event an emergency?

1. Yes
2. No

|   |                                                                                                                                                                                                                                                                                                                                                                                                                                                                                                                                                                                                                                                                                                                                                                                                                                      |
|---|--------------------------------------------------------------------------------------------------------------------------------------------------------------------------------------------------------------------------------------------------------------------------------------------------------------------------------------------------------------------------------------------------------------------------------------------------------------------------------------------------------------------------------------------------------------------------------------------------------------------------------------------------------------------------------------------------------------------------------------------------------------------------------------------------------------------------------------|
|   | <p>g. Did you contact a medical service within one hour?</p> <ol style="list-style-type: none"> <li>i. Yes</li> <li>ii. No, because: <ol style="list-style-type: none"> <li>1. Symptoms resolved</li> <li>2. Thought that the symptoms would resolve</li> <li>3. Did not consider it severe enough</li> <li>4. Others said it could wait</li> <li>5. Unable because of the symptoms</li> <li>6. Transportation issues</li> <li>7. It happened during outside office hours</li> <li>8. Other, namely: _____</li> </ol> </li> </ol>                                                                                                                                                                                                                                                                                                    |
| 4 | <p><i>Treatment by the GP, if applicable</i></p> <ol style="list-style-type: none"> <li>a. Did the GP start any medication? <ol style="list-style-type: none"> <li>iii. No</li> <li>iv. Yes, namely: <ol style="list-style-type: none"> <li>1. Aspirin</li> <li>2. Dipyridamole</li> <li>3. Anticoagulant</li> <li>4. Statin</li> <li>5. Antihypertensives</li> <li>6. Other, namely: _____</li> </ol> </li> </ol> </li> <li>b. If not, did you already use antithrombotic, or cardiovascular medication? <ol style="list-style-type: none"> <li>i. No</li> <li>ii. Yes, namely: <ol style="list-style-type: none"> <li>1. Aspirin</li> <li>2. Dipyridamole</li> <li>3. Anticoagulant</li> <li>4. Statin</li> <li>5. Antihypertensives</li> <li>6. Other, namely: _____</li> <li>7. Does not know</li> </ol> </li> </ol> </li> </ol> |

GP, general practitioner.
